# Supplementary material for: Senegalia macrostachya seed polysaccharides attenuate inflammation-induced intestinal epithelial barrier dysfunction in a Caco-2 and RAW264.7 macrophage co-culture model by inhibiting the NF-κB/MLCK pathway
Source: Royal Society of Chemistry journal article supplement (doi:10.1039/d2fo02377f), 2022-01-01
Supplement: d2fo02377f1.pdf [file d2fo02377f1.pdf]

### Supplementary data

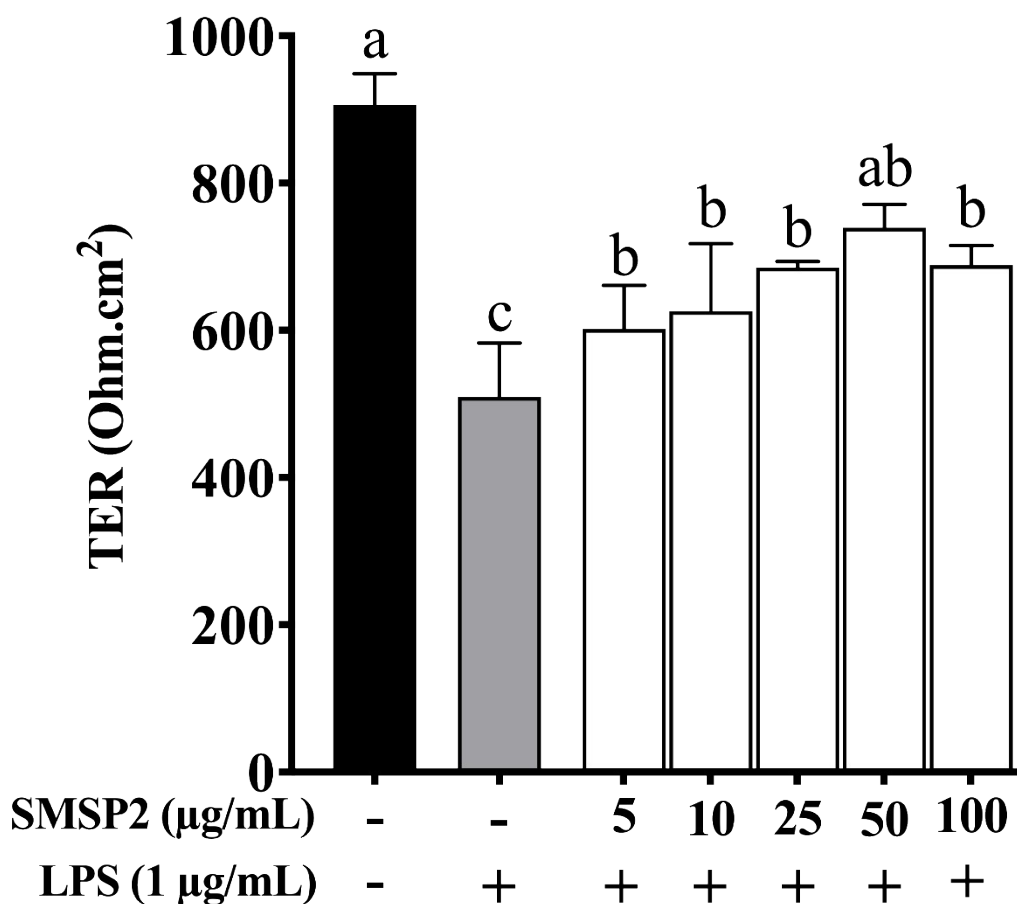

**Fig. S1:** Dose response of SMSP2 on Caco-2 cell monolayer TER values. Caco-2 cells were seeded in a Transwell filter and differentiated for 21 days. The fully differentiated Caco-2 cells were co-culture for 32 h with LPS-stimulated RAW264.7 macrophages seeded in the Transwell basolateral compartment and treated with or without SMSP2 at different concentration (5, 10, 25, 50, and 100  $\mu\text{g/mL}$ ). The TER was measured after 32 h of co-culture. Data are presented as mean  $\pm$  (SD);  $n=3$ . Bars with different letters indicate statistically significant differences between groups determined using one-way ANOVA followed by Tukey's HDS test ( $P < 0.05$ ).

Table 1: Primers used in the current study

| List                            | Forward (5'-3')            | Reverse (5'-3')          |
|---------------------------------|----------------------------|--------------------------|
| <b>iNOS</b>                     | GACCAGTACGTTTGGCAATG       | TTTCAGCATGAAGAGCGATTT    |
| <b>COX-2</b>                    | TTGCATTCTTTGCCAGCAC        | ACCGTAGATGCTCAGGGACT     |
| <b>IL-8</b>                     | GAGCACTCCATAAGGCACAAA      | ATGGTTCCTTCCGGTGGT       |
| <b>TNF-<math>\alpha</math></b>  | AGCCCATGTTGTAGCAAACC       | TCTCAGCTCCACGCCATT       |
| <b><math>\beta</math>-actin</b> | AAGTCCCTTGCCATCCTAAA       | ATGCTATCACCTCCCCTGTG     |
| <b>Claudin-1</b>                | GCATGAAGTGTATGAAGTGCTTGGGA | CGATTCTATTGCCATACCATGCTG |
| <b>ZO-1</b>                     | AGCCTGCAAAGCCAGCGCA        | AGTGGCCTGGATGGGTTTCATAG  |
| <b>Occludin</b>                 | TCCAATGGCAAAGTGAATGA       | CGCTGCTGTAACGAGGCT       |

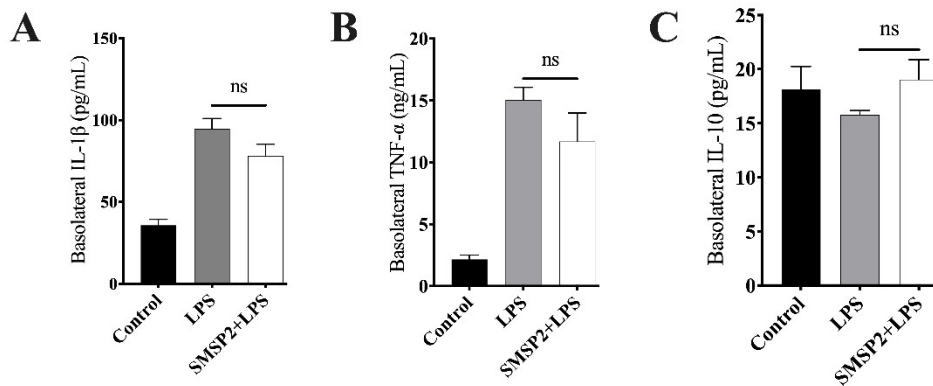

**Fig. S2:** Basolateral cytokines level. IL-1 $\beta$  (A), TNF- $\alpha$  (B) and IL-10 (C). Data are presented as mean  $\pm$  (SD); n=3. The significant difference was determined using one-way ANOVA: (\*) p < 0.05, compared to the LPS group. ns: non-significant
